# Supplementary material
Source: PubMed Central journal article supplement (PMC8917794)
Supplement: NIHMS1548892-supplement-Supplemental_Digital_Content_1.pdf [file NIHMS1548892-supplement-Supplemental_Digital_Content_1.pdf]

## Supplemental Table. Normative, Breast Cancer, and Propensity Matched Population

### Demographic Variables

|                                       | Entire Sample  | Matched        |                | Entire Sample  |
|---------------------------------------|----------------|----------------|----------------|----------------|
|                                       | Breast Cancer  | Breast Cancer  | Normative      | Normative      |
|                                       | % (N=6840)*    | % (N=4343)*    | % (N=922)*     | % (N=1200)*    |
| <b>Age Category</b>                   |                |                |                |                |
| 20-49                                 | 19.1           | 25.6           | 27.0           | 33.9           |
| 50-59                                 | 36.4           | 37.2           | 30.5           | 27.0           |
| 60-69                                 | 34.3           | 29.9           | 31.9           | 29.2           |
| 70+                                   | 9.5            | 7.2            | 10.6           | 9.8            |
| <b>Age, Median (Range)</b>            | 58.5 (25 – 92) | 56.6 (25 – 87) | 57.5 (26 – 85) | 56.0 (20 – 85) |
| <b>BMI, Median (Range)</b>            | 25.5 (13 – 71) | 25.2 (15 – 65) | 24.9 (16 – 66) | 24.8 (16 – 66) |
| <b>Race</b>                           |                |                |                |                |
| White                                 | 94.2           | 95.9           | 97.0           | 94.9           |
| Black or African American             | 1.8            | 1.3            | 1.0            | 0.9            |
| Asian or Pacific Islander             | 1.0            | 1.0            | 1.1            | 1.0            |
| American Indian or Alaskan Native     | 0.1            | 0.2            | 0.0            | 1.7            |
| Other (includes Biracial/Multiracial) | 2.7            | 1.3            | 0.9            | 0.8            |
| <b>Marital Status</b>                 |                |                |                |                |
| Married                               | 71.0           | 72.1           | 73.1           | 68.2           |

|                                      | Entire Sample | Matched       |            | Entire Sample |
|--------------------------------------|---------------|---------------|------------|---------------|
|                                      | Breast Cancer | Breast Cancer | Normative  | Normative     |
|                                      | % (N=6840)*   | % (N=4343)*   | % (N=922)* | % (N=1200)*   |
| Single, never married                | 6.8           | 7.6           | 7.9        | 11.2          |
| Living with significant other        | 5.3           | 5.5           | 5.9        | 6.8           |
| Divorced                             | 10.8          | 9.3           | 8.0        | 8.3           |
| Separated                            | 1.0           | 1.2           | 1.3        | 1.3           |
| Widowed                              | 4.9           | 4.3           | 3.8        | 4.1           |
| <b>Income Group</b>                  |               |               |            |               |
| < \$50,000/\$60,000                  | 20.4          | 22.1          | 20.9       | 25.2          |
| \$50,000/\$60,000 - \$99,999         | 36.8          | 31.7          | 30.7       | 28.3          |
| \$100,000+                           | 37.9          | 41.8          | 43.9       | 42.2          |
| <b>Educational Max</b>               |               |               |            |               |
| Some high school                     | 0.1           | 0.1           | 0.1        | 0.2           |
| High school diploma                  | 4.9           | 4.1           | 3.5        | 2.9           |
| Some college, trade or university    | 17.8          | 15.1          | 13.7       | 13.2          |
| College, trade or university diploma | 36.4          | 37.5          | 38.7       | 37.1          |
| Some Master/Doctoral degree          | 7.8           | 8.1           | 7.7        | 8.0           |
| Master/Doctoral degree               | 32.6          | 35.1          | 36.3       | 38.6          |
| <b>Employment Status</b>             |               |               |            |               |

|                                     | Entire Sample | Matched       |            | Entire Sample |
|-------------------------------------|---------------|---------------|------------|---------------|
|                                     | Breast Cancer | Breast Cancer | Normative  | Normative     |
|                                     | % (N=6840)*   | % (N=4343)*   | % (N=922)* | % (N=1200)*   |
| Student                             | 0.5           | 0.7           | 0.4        | 1.7           |
| Employed full-time                  | 38.1          | 41.6          | 42.6       | 44.2          |
| Employed part-time                  | 14.9          | 14.1          | 14.1       | 13.0          |
| Homemaker                           | 8.0           | 9.3           | 9.5        | 9.8           |
| Retired                             | 23.9          | 25.2          | 25.4       | 24.4          |
| Unable to work/disabled             | 2.6           | 1.5           | 1.1        | 1.1           |
| Unemployed/seeking employment       | 2.1           | 2.3           | 2.6        | 2.3           |
| Voluntary work                      | 4.3           | 2.8           | 2.7        | 2.3           |
| Other                               | 5.5           | 2.4           | 1.5        | 1.2           |
| <b>Cancer Type</b>                  |               |               |            |               |
| DCIS (Ductal Carcinoma In Situ)     | 30.2          | 30.4          |            |               |
| LCIS (Lobular Carcinoma In Situ)    | 2.0           | 1.8           |            |               |
| Invasive Ductal Carcinoma           | 33.9          | 35.0          |            |               |
| Invasive Lobular Carcinoma          | 5.9           | 5.5           |            |               |
| More Than One Type Of Breast Cancer | 15.6          | 15.7          |            |               |
| Other                               | 4.2           | 4.0           |            |               |

|                        | Entire Sample | Matched       | Entire Sample |
|------------------------|---------------|---------------|---------------|
|                        | Breast Cancer | Breast Cancer | Normative     |
|                        | % (N=6840)*   | % (N=4343)*   | % (N=922)*    |
|                        | % (N=1200)*   |               |               |
| <b>Stage</b>           |               |               |               |
| Stage 0                | 27.8          | 27.4          |               |
| Stage 1                | 29.8          | 29.2          |               |
| Stage 2                | 28.3          | 29.3          |               |
| Stage 3                | 9.5           | 9.6           |               |
| <b>Surgery Type</b>    |               |               |               |
| Lumpectomy             | 50.7          | 49.4          |               |
| Mastectomy             | 17.4          | 17.0          |               |
| Implants               | 20.2          | 21.7          |               |
| Autologous             | 11.7          | 11.9          |               |
| <b>Chemotherapy</b>    |               |               |               |
| No                     | 42.6          | 41.2          |               |
| Yes                    | 57.4          | 58.8          |               |
| <b>Hormone Therapy</b> |               |               |               |
| No                     | 32.2          | 31.6          |               |
| Yes                    | 67.8          | 68.4          |               |
| <b>Radiation</b>       |               |               |               |

|                                                                                               | Entire Sample | Matched       | Entire Sample |
|-----------------------------------------------------------------------------------------------|---------------|---------------|---------------|
|                                                                                               | Breast Cancer | Breast Cancer | Normative     |
|                                                                                               | % (N=6840)*   | % (N=4343)*   | % (N=922)*    |
|                                                                                               | % (N=1200)*   |               |               |
| No                                                                                            | 34.1          | 35.1          |               |
| Yes                                                                                           | 65.9          | 64.9          |               |
| <b>Treatment Facility</b>                                                                     |               |               |               |
| Community Hospital or Community<br>Hospital Affiliated Cancer Center                          | 50.2          | 50.3          |               |
| Managed Care Organizations                                                                    | 5.5           | 5.0           |               |
| Stand Alone Cancer Center that (not<br>affiliated with a community or university<br>hospital) | 13.9          | 14.5          |               |
| University Hospital or University<br>Affiliated Cancer Center                                 | 20.3          | 20.4          |               |
| Other                                                                                         | 7.6           | 7.3           |               |
| <b>Geographic Region</b>                                                                      |               |               |               |
| Midwest                                                                                       | 20.9          | 20.7          |               |
| Northeast                                                                                     | 24.7          | 24.5          |               |
| South                                                                                         | 28.4          | 29.2          |               |
| West                                                                                          | 25.6          | 25.3          |               |

|                                                    | Entire Sample     | Matched           | Entire Sample |
|----------------------------------------------------|-------------------|-------------------|---------------|
|                                                    | Breast Cancer     | Breast Cancer     | Normative     |
|                                                    | % (N=6840)*       | % (N=4343)*       | % (N=922)*    |
| <b>Time Since Surgery in years, Median (Range)</b> | 5.0 (<0.1 – 59.1) | 4.7 (<0.1 – 45.7) | % (N=1200)*   |
| <b>Time Since Surgery (Categorical)</b>            |                   |                   |               |
| < 1 year                                           | 9.8               | 10.9              |               |
| [1, 5] years                                       | 40.1              | 41.6              |               |
| (5,10] years                                       | 26.6              | 26.3              |               |
| (10,15] years                                      | 13.8              | 12.6              |               |
| (15,20] years                                      | 6.0               | 5.1               |               |
| > 20 years                                         | 3.6               | 3.4               |               |
| <b>Recurrence</b>                                  |                   |                   |               |
| No                                                 | 93.9              | 94.0              |               |
| Yes                                                | 5.5               | 5.3               |               |
| <b>Currently Receiving Treatment</b>               |                   |                   |               |
| No                                                 | 71.1              | 69.4              |               |
| Yes                                                | 28.6              | 30.2              |               |
| <b>Major Complication</b>                          |                   |                   |               |
| No                                                 | 95.9              | 96.0              |               |

|                                  | Entire Sample | Matched       | Entire Sample |
|----------------------------------|---------------|---------------|---------------|
|                                  | Breast Cancer | Breast Cancer | Normative     |
|                                  | % (N=6840)*   | % (N=4343)*   | % (N=922)*    |
| Yes                              | 4.1           | 4.0           | % (N=1200)*   |
| <b>Minor Complication</b>        |               |               |               |
| No                               | 74.6          | 75.2          |               |
| Yes                              | 25.4          | 24.8          |               |
| <b>New Primary Breast Cancer</b> |               |               |               |
| No                               | 93.6          | 93.9          |               |
| Yes                              | 6.4           | 6.1           |               |
| <b>Ethnicity</b>                 |               |               |               |
| Hispanic or Latino               | 1.9           | 1.6           |               |
| Not Hispanic or Latino           | 96.4          | 96.9          |               |

\* Percentages may not add up to 100 due to rounding or missing values
