# Supplementary material
Source: PubMed Central journal article supplement (PMC8917794)
Supplement: NIHMS1548892-supplement-Supplemental_Digital_Content_2.pdf [file NIHMS1548892-supplement-Supplemental_Digital_Content_2.pdf]

Supplemental Table. Tests of BREAST-Q Score Differences Among Propensity-Matched Participants, Adjusted for Age, BMI, Marital Status, and Income Group

| Variable                 | Satisfaction with                        |         |                                          |         |                                          |         |                                          |         |
|--------------------------|------------------------------------------|---------|------------------------------------------|---------|------------------------------------------|---------|------------------------------------------|---------|
|                          | Breasts                                  |         | Psychosocial Well-being                  |         | Physical Well-being                      |         | Sexual Well-being                        |         |
|                          | Diff. in Mean<br>(lower to upper 95% CI) | p-value | Diff. in Mean<br>(lower to upper 95% CI) | p-value | Diff. in Mean<br>(lower to upper 95% CI) | p-value | Diff. in Mean<br>(lower to upper 95% CI) | p-value |
| <b>Surgery Types</b>     |                                          |         |                                          |         |                                          |         |                                          |         |
| BCS vs. Normative        | 8.35 (6.79 to 9.90)                      | <.01    | 8.66 (7.21 to 10.12)                     | <.01    | -19.79 (-20.94 to -18.63)                | <.01    | -0.95 (-2.61 to 0.71)                    | 0.26    |
| Mastectomy vs. Normative | -1.36 (-3.32 to 0.60)                    | 0.17    | -1.62 (-3.44 to 0.21)                    | 0.08    | -16.33 (-17.79 to -14.88)                | <.01    | -12.41 (-14.52 to -10.30)                | <.01    |
| Implants vs. Normative   | 1.84 (-0.002 to 3.68)                    | 0.05    | 1.27 (-0.45 to 2.99)                     | 0.15    | -15.96 (-17.32 to -14.59)                | <.01    | -7.49 (-9.44 to -5.55)                   | <.01    |
| Autologous vs. Normative | 11.64 (9.48 to 13.80)                    | <.01    | 8.17 (6.16 to 10.18)                     | <.01    | -14.23 (-15.83 to -12.63)                | <.01    | -1.35 (-3.65 to 0.95)                    | 0.25    |

Diff. = difference; CI = confidence interval; Pt = patient; BCS = breast conserving surgery; Difference in Mean: positive number indicates higher scores in the cancer group
