# Supplementary material
Source: PubMed Central journal article supplement (PMC8917794)
Supplement: NIHMS1548892-supplement-Supplemental_Digital_Content_3.pdf [file NIHMS1548892-supplement-Supplemental_Digital_Content_3.pdf]

Supplemental Table. BREAST-Q Scores Over Time Among Normative-Matched Breast Cancer Patients, Slope (change in mean per year) Adjusted for Age, BMI, Marital Status, Income, and Stage

| Module                    | Interaction Term p | Lumpectomy |                | Mastectomy |              | Implant  |                | Autologous |               |
|---------------------------|--------------------|------------|----------------|------------|--------------|----------|----------------|------------|---------------|
|                           |                    | Estimate   | 95%CI          | Estimate   | 95 % CI      | Estimate | 95 % CI        | Estimate   | 95 % CI       |
| Satisfaction with Breasts | <.01               | -0.53      | (-0.71, -0.35) | 0.28       | (0.07, 0.50) | -0.43    | (-0.67, -0.19) | -0.19      | (-0.52, 0.14) |
| Psychosocial Well-being   | 0.11               | -0.01      | (-0.18, 0.16)  | 0.30       | (0.10, 0.51) | 0.07     | (-0.16, 0.29)  | 0.16       | (-0.15, 0.48) |
| Physical Well-being       | 0.28               | 0.40       | (0.26, 0.53)   | 0.60       | (0.43, 0.76) | 0.42     | (0.23, 0.60)   | 0.45       | (0.20, 0.71)  |
| Sexual Well-being         | 0.24               | 0.08       | (-0.11, 0.28)  | 0.34       | (0.10, 0.58) | 0.02     | (-0.23, 0.28)  | 0.22       | (-0.14, 0.58) |

CI = confidence interval
